# Supplementary material for: Estimating the Allele-Specific Expression of SNVs From 10× Genomics Single-Cell RNA-Sequencing Data
Source: MDPI journal article supplement (doi:10.3390/genes11030240), 2020-02-25
Supplement: s1 [file s1]

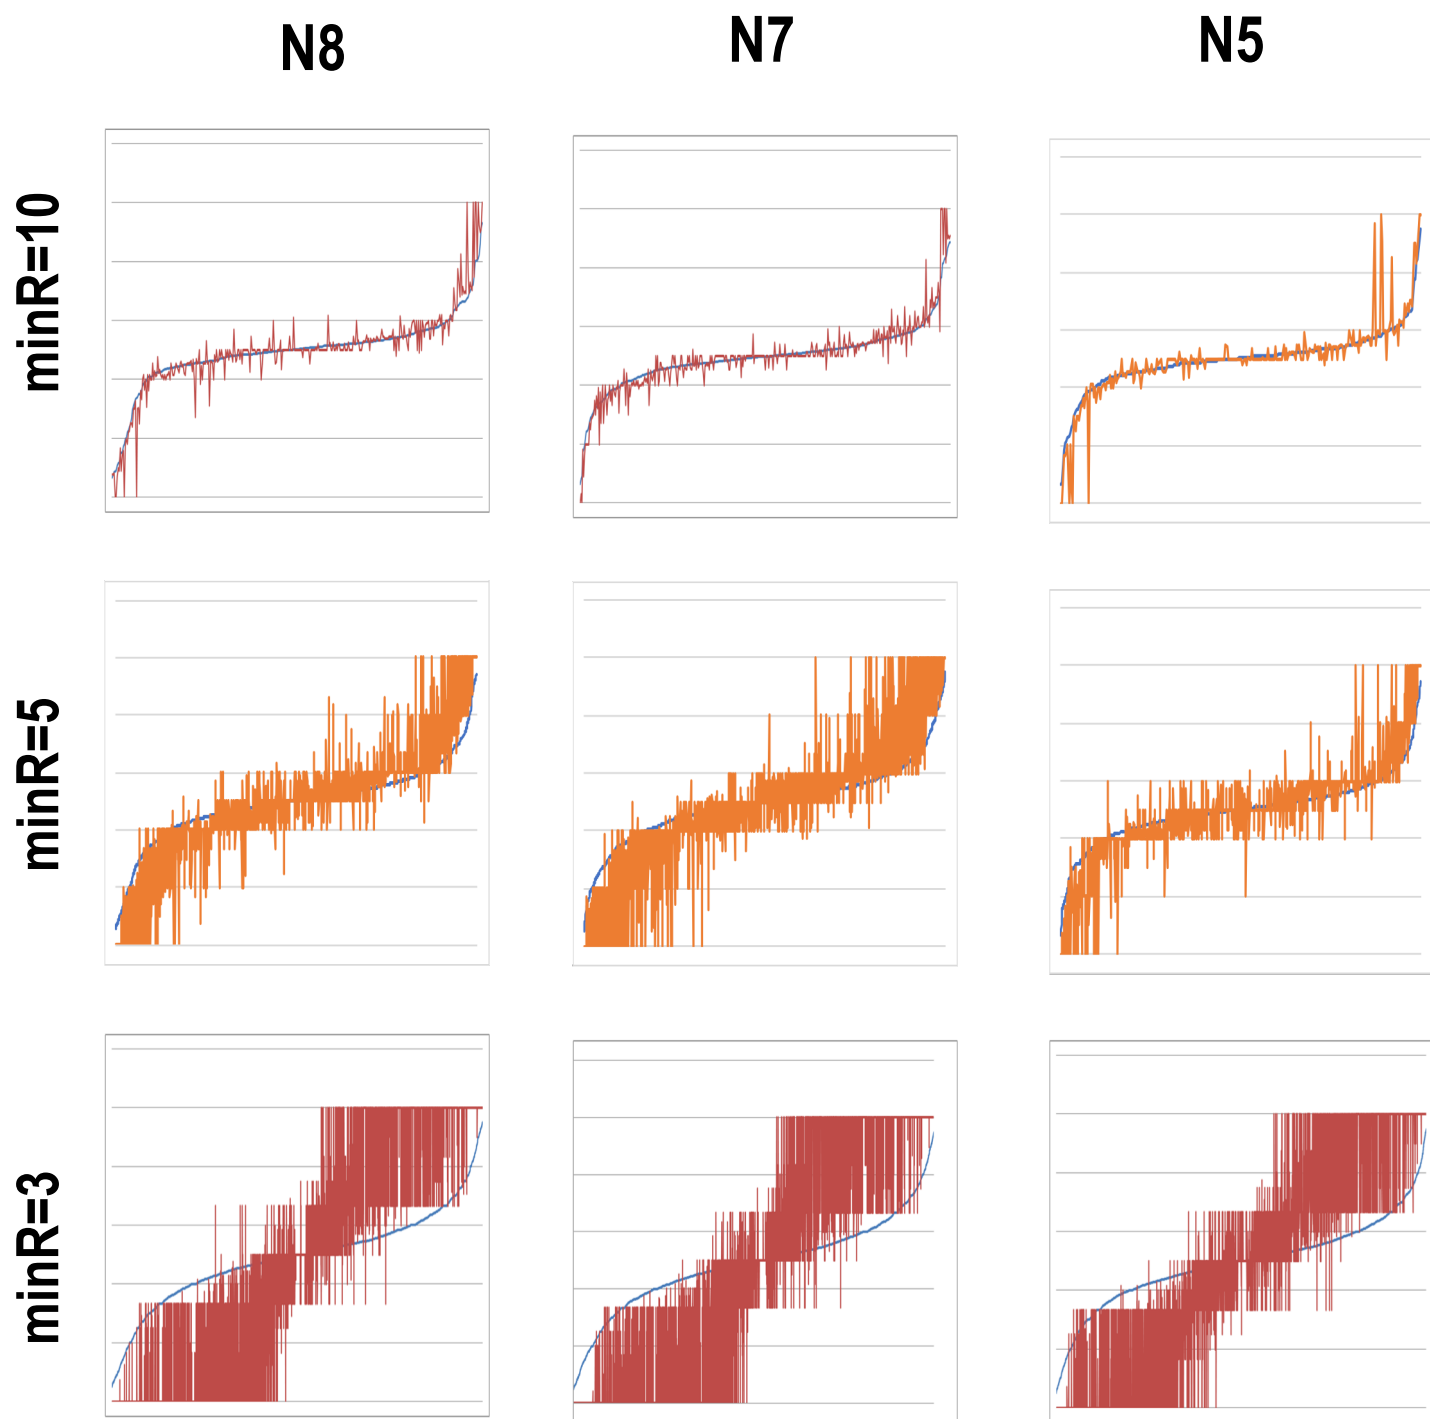

Supplementary Figure 1: Mean (blue) and Median (orange)  $\text{VAF}_{\text{RNA}}$  at different thresholds of required minimum sequencing reads ( $\text{minR} = 10$  (top),  $\text{minR} = 5$  (middle) and  $\text{minR} = 3$  (bottom)/
